# Supplementary material
Source: HighWire-hosted journal article supplement (https://bmjopen.bmj.com/content/9/10/e023543)
Supplement: inline-supplementary-material-1 [file inline-supplementary-material-1.pdf]

Appendix A. Distribution of IADL scale (independence) in demographic characteristics and health status.

| Variables                          | Males |                      |                   |       | Females |                      |                    |       |
|------------------------------------|-------|----------------------|-------------------|-------|---------|----------------------|--------------------|-------|
|                                    | N     | Independence<br>N(%) | OR(95%CI)         | p     | N       | Independence<br>N(%) | OR(95%CI)          | p     |
| <b>Demographic characteristics</b> |       |                      |                   |       |         |                      |                    |       |
| <b>Age</b>                         |       |                      |                   |       |         |                      |                    |       |
| 75+                                | 580   | 174(30.0)            |                   |       | 814     | 158(19.4)            |                    |       |
| 65-74                              | 1146  | 625(54.5)            | 2.80(2.26-3.46)   | <0.01 | 1146    | 647(56.5)            | 5.38(4.37-6.64)    | <0.01 |
| <b>Ethnicity</b>                   |       |                      |                   |       |         |                      |                    |       |
| Minority                           | -     | -                    |                   |       | 269     | 41(15.2)             |                    |       |
| Han                                | -     | -                    | -                 |       | 1690    | 763(45.1)            | 4.58(3.24-6.47)    | <0.01 |
| <b>Marital status</b>              |       |                      |                   |       |         |                      |                    |       |
| Other                              | 302   | 62(20.5)             |                   |       | 470     | 97(20.6)             |                    |       |
| Married/cohabitation               | 1423  | 737(51.8)            | 4.16(3.09-5.60)   | <0.01 | 1490    | 708(47.5)            | 3.48(2.72-4.45)    | <0.01 |
| <b>Living arrangement</b>          |       |                      |                   |       |         |                      |                    |       |
| Living alone                       | 184   | 40(21.7)             |                   |       | 227     | 70(30.8)             |                    |       |
| Living with spouse                 | 1230  | 666(54.1)            | 4.25(2.94-6.14)   | <0.01 | 1159    | 619(53.4)            | 2.57(1.90-3.49)    | <0.01 |
| Living with spouse and children    | 184   | 68(37.0)             | 2.11(1.33-3.35)   | <0.01 | 327     | 88(26.9)             | 0.83(0.57-1.20)    | 0.31  |
| Living with children               | 126   | 25(19.8)             | 0.89(0.51-1.56)   | 0.69  | 243     | 27(11.1)             | 0.28(0.17-0.46)    | <0.01 |
| <b>Pension</b>                     |       |                      |                   |       |         |                      |                    |       |
| Haven't                            | 116   | 42(36.2)             |                   |       | 188     | 30(16.0)             |                    |       |
| Have                               | 1606  | 755(47.0)            | 1.56(1.06-2.31)   | 0.02  | 1769    | 772(43.6)            | 4.08(2.73-6.09)    | <0.01 |
| <b>Health status</b>               |       |                      |                   |       |         |                      |                    |       |
| <b>Chronic disease</b>             |       |                      |                   |       |         |                      |                    |       |
| Present                            | 1264  | 432(34.2)            |                   |       | 1529    | 488(31.9)            |                    |       |
| Not present                        | 462   | 367(79.4)            | 7.44(5.77-9.59)   | <0.01 | 431     | 317(73.5)            | 5.93(4.67-7.54)    | <0.01 |
| <b>Visual ability</b>              |       |                      |                   |       |         |                      |                    |       |
| Impaired                           | 691   | 262(37.9)            |                   |       | 844     | 237(28.1)            |                    |       |
| Good                               | 1030  | 534(51.8)            | 1.76(1.45-2.15)   | <0.01 | 1112    | 566(50.9)            | 2.66(2.19-3.21)    | <0.01 |
| <b>Hearing ability</b>             |       |                      |                   |       |         |                      |                    |       |
| Impaired                           | 763   | 224(29.4)            |                   |       | 853     | 198(23.2)            |                    |       |
| Good                               | 957   | 571(59.7)            | 3.56(2.91-4.36)   | <0.01 | 1102    | 605(54.9)            | 4.03(3.30-4.91)    | <0.01 |
| <b>Daily sleeping time</b>         |       |                      |                   |       |         |                      |                    |       |
| <4/>8 hours                        | 110   | 31(28.2)             |                   |       | 210     | 24(11.4)             |                    |       |
| 4-6 hours                          | 906   | 384(42.4)            | 1.87(1.21-2.90)   | <0.01 | 977     | 391(40.0)            | 5.17(3.32-8.06)    | <0.01 |
| 6-8 hours                          | 710   | 384(54.1)            | 3.00(1.93-4.66)   | <0.01 | 769     | 388(50.5)            | 7.89(5.04-12.35)   | <0.01 |
| <b>Sleeping quality</b>            |       |                      |                   |       |         |                      |                    |       |
| Bad                                | 765   | 231(30.2)            |                   |       | 968     | 265(27.4)            |                    |       |
| Good                               | 961   | 568(59.1)            | 3.34(2.73-4.08)   | <0.01 | 992     | 540(54.4)            | 3.17(2.62-3.83)    | <0.01 |
| <b>Chewing ability</b>             |       |                      |                   |       |         |                      |                    |       |
| Bad                                | 426   | 88(20.7)             |                   |       | 651     | 101(15.5)            |                    |       |
| Middle                             | 903   | 405(44.9)            | 3.12(2.39-4.09)   | <0.01 | 989     | 455(46.0)            | 4.64(3.63-5.94)    | <0.01 |
| Good                               | 396   | 306(77.3)            | 13.06(9.37-18.20) | <0.01 | 317     | 248(78.2)            | 19.60(13.92-27.52) | <0.01 |

Note. OR: Odd ratio, indicating the relative risk of independence prevalence in comparison to the first group of each item; 95%CI: 95% confidence interval.

## Appendix B. The description of scores of demographic characteristics and health status.

| Variables                          | Males |            | Females |            |
|------------------------------------|-------|------------|---------|------------|
|                                    | N     | Mean±SD    | N       | Mean±SD    |
| <b>Demographic characteristics</b> |       |            |         |            |
| Age                                | 1726  | 72.87±5.84 | 1960    | 73.55±5.82 |
| Ethnicity                          | --    | --         | 1959    | 4.09±1.23  |
| Marital status                     | 1725  | 3.61±1.20  | 1960    | 2.89±1.06  |
| Living arrangement                 | 1724  | 3.43±1.33  | 1956    | 1.81±0.93  |
| Pension                            | 1722  | 1.53±0.14  | 1957    | 3.78±0.91  |
| <b>Health status</b>               |       |            |         |            |
| Chronic disease                    | 1726  | 2.72±2.85  | 1960    | 2.08±2.04  |
| Visual ability                     | 1721  | 1.46±0.37  | 1956    | 1.94±0.82  |
| Hearing ability                    | 1720  | 2.42±1.27  | 1955    | 2.71±1.50  |
| Daily sleeping time                | 1726  | 2.28±0.64  | 1956    | 5.79±2.10  |
| Sleeping quality                   | 1726  | 2.30±1.16  | 1960    | 2.10±1.09  |
| Chewing ability                    | 1725  | 4.88±4.55  | 1957    | 5.85±6.25  |
